# Supplementary material for: Evaluation of COVID-19 Vaccine Attitudes among Arab American Healthcare Professionals Living in the United States
Source: MDPI journal article supplement (doi:10.3390/vaccines9090942), 2021-08-24
Supplement: s1 [file s1]

**Supplemental Table S1.** Univariable and multivariable logistic regression analyses of risk factors associated with vaccine hesitancy (Yes vs. No, No as reference), where “Will probably get the vaccine” was considered ‘No’

| Survey Question                                                         | E/N    | Univariable <sup>a</sup> |                              | E/N    | Multivariable <sup>b</sup> |                          |
|-------------------------------------------------------------------------|--------|--------------------------|------------------------------|--------|----------------------------|--------------------------|
|                                                                         |        | OR (95% CI)              | p                            |        | OR (95% CI)                | p                        |
| <b>What is your age?</b>                                                |        |                          | <b>0.030<sup>c</sup></b>     |        |                            | 0.576 <sup>c</sup>       |
| 18-29 years old                                                         | 32/216 | Reference                |                              | 24/185 | Reference                  |                          |
| 30-59 years old                                                         | 26/215 | 0.791 (0.451, 1.377)     | <b>0.408</b>                 | 20/193 | 0.767 (0.254,2.261)        | 0.633                    |
| 60+ years old                                                           | 2/82   | 0.144 (0.023,0.490)      | <b>0.009</b>                 | 1/75   | 0.277 (0.013,2.316)        | 0.294                    |
| <b>Which gender do you identify with?</b>                               |        |                          |                              |        |                            |                          |
| Female                                                                  | 38/238 | Reference                |                              | 29/206 | Reference                  |                          |
| Male                                                                    | 21/271 | 0.442 (0.248,0.77)       | <b>0.005</b>                 | 16/247 | 0.883 (0.401,1.934)        | 0.756                    |
| <b>What is your marital status?</b>                                     |        |                          | 0.135 <sup>c</sup>           |        |                            | 0.214 <sup>c</sup>       |
| Single                                                                  | 30/230 | Reference                |                              | 21/196 | Reference                  |                          |
| Married                                                                 | 23/261 | 0.644 (0.359,1.141)      | 0.134                        | 21/239 | 2.296 (0.826,6.552)        | 0.114                    |
| Divorced/separated/widowed                                              | 4/19   | 1.778 (0.482,5.290)      | 0.334                        | 3/18   | 3.914 (0.545,24.405)       | 0.152                    |
| <b>What country were you born in?</b>                                   |        |                          |                              |        |                            |                          |
| North Africa/Middle East                                                | 26/275 | Reference                |                              | 19/251 | Reference                  |                          |
| North America/Europe                                                    | 33/229 | 1.612 (0.935,2.806)      | 0.087                        | 26/202 | 1.249 (0.187,6.890)        | 0.808                    |
| <b>When did you move to the United States?</b>                          |        |                          | <b>0.021<sup>c</sup></b>     |        |                            | 0.164 <sup>c</sup>       |
| Less than 10 years                                                      | 12/76  | Reference                |                              | 10/65  | Reference                  |                          |
| 20 years ago or longer                                                  | 15/218 | 0.394 (0.176,0.900)      | <b>0.024</b>                 | 10/196 | 0.315 (0.091,1.056)        | 0.062                    |
| Born in the United States                                               | 32/218 | 0.918 (0.456,1.952)      | 0.815                        | 25/192 | 0.465 (0.085,3.303)        | 0.407                    |
| <b>What is your highest level of education?</b>                         |        |                          |                              |        |                            |                          |
| <b>If currently enrolled, please note your highest degree received.</b> |        |                          |                              |        |                            |                          |
| No professional degree                                                  | 45/233 | Reference                |                              | 32/191 | Reference                  |                          |
| Professional degree                                                     | 15/279 | 0.237 (0.125,0.429)      | <b>&lt;0.001</b>             | 13/262 | 0.711 (0.258,1.872)        | 0.498                    |
| <b>What kind of health care professional are you?</b>                   |        |                          | <b>&lt;0.001<sup>c</sup></b> |        |                            | <b>0.017<sup>c</sup></b> |
| Physician/Nursing                                                       | 12/250 | Reference                |                              | 11/238 | Reference                  |                          |
| Allied profession                                                       | 28/93  | 8.544 (4.210,18.323)     | <b>&lt;0.001</b>             | 25/88  | 3.522 (1.191,10.746)       | <b>0.024</b>             |
| Student                                                                 | 11/141 | 1.678 (0.710,3.933)      | 0.230                        | 9/127  | 1.164 (0.296,4.648)        | 0.828                    |
| <b>What is your yearly household income?</b>                            |        |                          |                              |        |                            |                          |

|                                                                    |        |                       |                  |        |                      |                  |
|--------------------------------------------------------------------|--------|-----------------------|------------------|--------|----------------------|------------------|
| Under \$150,000                                                    | 43/242 | Reference             |                  | 33/213 | Reference            |                  |
| Over \$150,000                                                     | 15/260 | 0.283 (0.148,0.514)   | <b>&lt;0.001</b> | 12/240 | 0.791 (0.317,1.927)  | 0.608            |
| <b>Have you received an influenza vaccine in the last 5 years?</b> |        |                       |                  |        |                      |                  |
| Yes                                                                | 28/443 | Reference             |                  | 22/403 | Reference            |                  |
| No                                                                 | 28/57  | 14.310 (7.543,27.528) | <b>&lt;0.001</b> | 23/50  | 8.674 (3.941,19.302) | <b>&lt;0.001</b> |
| <b>I know someone personally who has contracted COVID-19.</b>      |        |                       |                  |        |                      |                  |
| Yes                                                                | 54/486 | Reference             |                  | 42/433 | Reference            |                  |
| No                                                                 | 6/27   | 2.286 (0.810,5.602)   | 0.088            | 3/20   | 0.480 (0.075,2.414)  | 0.400            |
| <b>I know someone personally who has died of COVID-19.</b>         |        |                       |                  |        |                      |                  |
| No                                                                 | 31/219 | Reference             |                  | 23/196 | Reference            |                  |
| Yes                                                                | 29/293 | 0.666 (0.387,1.114)   | 0.140            | 22/257 | 0.810 (0.367,1.772)  | 0.597            |

---

COVID-19, coronavirus disease 2019; E/N, numbers of events and participants; OR, odds ratio. Bold and italic is used to emphasize statistical significance ( $p \leq 0.005$ ). <sup>a</sup>Univariable logistic regression analysis. <sup>b</sup>Multivariable logistic regression analysis. <sup>c</sup>Global p-value obtained by likelihood ratio tests.
